# Supplementary material for: Gene Expression Analysis Indicates Divergent Mechanisms in DEN-Induced Carcinogenesis in Wild Type and Bid-Deficient Livers
Source: PLOS journal article supplement (doi:10.1371/journal.pone.0155211), 2016-05-19
Supplement: S10 (10.1371/journal.pone.0155211.s010) [file journal.pone.0155211.s010]

**S10 Table. Genes that are involved in immune response and/or inflammation, and that are upregulated in WT mice treated with DEN for 10-12 Months**

| Gene Symbol | Gene Name                                                 | Probe ID | Fold of Change | p value | Pathways                                                                                                                                                                                                                                                                                                               | Functional Class                                                                                                                                                                                                                                                                                             |
|-------------|-----------------------------------------------------------|----------|----------------|---------|------------------------------------------------------------------------------------------------------------------------------------------------------------------------------------------------------------------------------------------------------------------------------------------------------------------------|--------------------------------------------------------------------------------------------------------------------------------------------------------------------------------------------------------------------------------------------------------------------------------------------------------------|
| C1QA        | complement component 1, q subcomponent, alpha polypeptide | 98562_at | 1.6453         | 0.0269  | <a href="#">Complement_and_coagulation_cascades</a><br><br><a href="#">Systemic_lupus_erythematosus</a><br><a href="#">Chagas_disease_(American_trypanosomiasis)</a><br><a href="#">Pertussis</a><br><a href="#">Staphylococcus_aureus_infection</a><br><a href="#">Prion_diseases</a>                                 | Organismal Systems: Immune System<br><br>Human Diseases: Immune diseases<br>Human Diseases: Infectious diseases<br>Human Diseases: Infectious diseases<br>Human Diseases: Infectious diseases<br>Human Diseases: Neurodegenerative diseases                                                                  |
| C1QB        | complement component 1, q subcomponent, beta polypeptide  | 96020_at | 2.0625         | 0.0271  | <a href="#">Complement_and_coagulation_cascades</a><br><br><a href="#">Systemic_lupus_erythematosus</a><br><a href="#">Chagas_disease_(American_trypanosomiasis)</a><br><a href="#">Pertussis</a><br><a href="#">Staphylococcus_aureus_infection</a><br><a href="#">Prion_diseases</a>                                 | Organismal Systems: Immune System<br><br>Human Diseases: Immune diseases<br>Human Diseases: Infectious diseases<br>Human Diseases: Infectious diseases<br>Human Diseases: Infectious diseases<br>Human Diseases: Neurodegenerative diseases                                                                  |
| C1QC        | complement component 1, q subcomponent, c polypeptide     | 92223_at | 1.7362         | 0.0065  | <a href="#">Complement_and_coagulation_cascades</a><br><br><a href="#">Systemic_lupus_erythematosus</a><br><a href="#">Chagas_disease_(American_trypanosomiasis)</a><br><a href="#">Pertussis</a><br><a href="#">Staphylococcus_aureus_infection</a><br><a href="#">Prion_diseases</a>                                 | Organismal Systems: Immune System<br><br>Human Diseases: Immune diseases<br>Human Diseases: Infectious diseases<br>Human Diseases: Infectious diseases<br>Human Diseases: Infectious diseases<br>Human Diseases: Neurodegenerative diseases                                                                  |
| CCL4        | small inducible cytokine A4                               | 94146_at | 1.2846         | 0.0351  | <a href="#">Toll_like_receptor_signaling_pathway</a><br><br><a href="#">Chemokine_signaling_pathway</a><br><br><a href="#">Cytosolic_DNA_sensing_pathway</a><br><br><a href="#">Cytokine_cytokine_receptor_interaction</a><br><br><a href="#">NF_kappa_B_signaling_pathway</a><br><a href="#">Salmonella_infection</a> | Organismal Systems: Immune System<br><br>Organismal Systems: Immune System<br><br>Organismal Systems: Immune System<br><br>Environmental Information Processing: Signaling molecules and interaction<br><br>Environmental Information Processing: Signal transduction<br>Human Diseases: Infectious diseases |
| CCL5        | small inducible cytokine A5                               | 98406_at | 1.4894         | 0.0475  | <a href="#">TNF_signaling_pathway</a><br><br><a href="#">Cytokine_cytokine_receptor_interaction</a><br><br><a href="#">Chemokine_signaling_pathway</a>                                                                                                                                                                 | Environmental Information Processing: Signal transduction<br>Environmental Information Processing: Signaling molecules and interaction<br><br>Organismal Systems: Immune System                                                                                                                              |

|       |                                       |             |        |        |                                                           |                                                                           |
|-------|---------------------------------------|-------------|--------|--------|-----------------------------------------------------------|---------------------------------------------------------------------------|
|       |                                       |             |        |        | <a href="#">NOD_like_receptor_signaling_pathway</a>       | Organismal Systems: Immune System                                         |
|       |                                       |             |        |        | <a href="#">Cytosolic_DNA_sensing_pathway</a>             | Organismal Systems: Immune System                                         |
|       |                                       |             |        |        | <a href="#">Rheumatoid_arthritis</a>                      | Human Diseases: Immune diseases                                           |
|       |                                       |             |        |        | <a href="#">Herpes_simplex_infection</a>                  | Human Diseases: Infectious diseases                                       |
|       |                                       |             |        |        | <a href="#">Influenza_A</a>                               | Human Diseases: Infectious diseases                                       |
|       |                                       |             |        |        | <a href="#">Chagas_disease_(American_trypanosomiasis)</a> | Human Diseases: Infectious diseases                                       |
|       |                                       |             |        |        | <a href="#">Prion_diseases</a>                            | Human Diseases: Neurodegenerative diseases                                |
| CD14  | CD14 antigen                          | 98088_at    | 2.0174 | 0.0178 | <a href="#">Hematopoietic_cell_lineage</a>                | Organismal Systems: Immune System                                         |
|       |                                       |             |        |        | <a href="#">Toll_like_receptor_signaling_pathway</a>      | Organismal Systems: Immune System                                         |
|       |                                       |             |        |        | <a href="#">NF_kappa_B_signaling_pathway</a>              | Environmental Information Processing: Signal transduction                 |
|       |                                       |             |        |        | <a href="#">Amoebiasis</a>                                | Human Diseases: Infectious diseases                                       |
|       |                                       |             |        |        | <a href="#">Legionellosis</a>                             | Human Diseases: Infectious diseases                                       |
|       |                                       |             |        |        | <a href="#">Pertussis</a>                                 | Human Diseases: Infectious diseases                                       |
|       |                                       |             |        |        | <a href="#">Salmonella_infection</a>                      | Human Diseases: Infectious diseases                                       |
|       |                                       |             |        |        | <a href="#">MAPK_signaling_pathway</a>                    | Environmental Information Processing: Signal transduction                 |
|       |                                       |             |        |        | Phagosome                                                 | Cellular Process: Transport and catabolism                                |
|       |                                       |             |        |        | <a href="#">Regulation_of_actin_cytoskeleton</a>          | Cellular Process: Cell motility                                           |
| CD99  | CD99 antigen                          | 101047_at   | 1.6316 | 0.0426 | <a href="#">Leukocyte_transendothelial_migration</a>      | Organismal Systems: Immune System                                         |
|       |                                       |             |        |        | <a href="#">Cell_adhesion_molecules_(CAMs)</a>            | Environmental Information Processing: Signaling molecules and interaction |
| CYBA  | cytochrome b-245, alpha polypeptide   | 100059_at;  | 1.4238 | 0.0014 | <a href="#">Leukocyte_transendothelial_migration</a>      | Organismal Systems: Immune System                                         |
|       |                                       | 97013_f_at  | 1.5608 | 0.0332 | <a href="#">Leishmaniasis</a>                             | Human Diseases: Infectious diseases                                       |
|       |                                       |             |        |        | <a href="#">Osteoclast_differentiation</a>                | Organismal Systems: Development                                           |
|       |                                       |             |        |        | Phagosome                                                 | Cellular Process: Transport and catabolism                                |
| DNTT  | deoxynucleotidyltransferase, terminal | 103962_at   | 1.2917 | 0.0254 | <a href="#">Hematopoietic_cell_lineage</a>                | Organismal Systems: Immune System                                         |
|       |                                       |             |        |        | <a href="#">Non_homologous_end_joining</a>                | Genetic Information Processing: Replication and repair                    |
| FCGR1 | Fc receptor, IgG, high affinity I     | 102879_s_at | 1.3349 | 0.0079 | <a href="#">Fc_gamma_R_mediated_phagocytosis</a>          | Organismal Systems: Immune System                                         |
|       |                                       |             |        |        | <a href="#">Hematopoietic_cell_lineage</a>                | Organismal Systems: Immune System                                         |
|       |                                       |             |        |        | <a href="#">Systemic_lupus_erythematosus</a>              | Human Diseases: Immune diseases                                           |
|       |                                       |             |        |        | <a href="#">Leishmaniasis</a>                             | Human Diseases: Infectious diseases                                       |
|       |                                       |             |        |        | <a href="#">Staphylococcus_aureus_infection</a>           | Human Diseases: Infectious diseases                                       |

|       |                                |             |        |        |                                                                                                                                                                                                                                                                     |                                                                                                                                                                                                                                                                                                                                                                                                                               |
|-------|--------------------------------|-------------|--------|--------|---------------------------------------------------------------------------------------------------------------------------------------------------------------------------------------------------------------------------------------------------------------------|-------------------------------------------------------------------------------------------------------------------------------------------------------------------------------------------------------------------------------------------------------------------------------------------------------------------------------------------------------------------------------------------------------------------------------|
| HCK   | hemopoietic cell kinase        | 93483_at    | 1.4239 | 0.0146 | Tuberculosis<br>Phagosome                                                                                                                                                                                                                                           | Human Diseases: Infectious diseases<br>Cellular Process: Transport and catabolism<br>Organismal Systems: Development<br>Human Diseases: Cancers                                                                                                                                                                                                                                                                               |
|       |                                |             |        |        | Osteoclast_differentiation<br>Transcriptional_misregulation_in_cancer<br>Fc_gamma_R_mediated_phagocytosis<br>Chemokine_signaling_pathway                                                                                                                            | Organismal Systems: Immune System<br>Organismal Systems: Immune System                                                                                                                                                                                                                                                                                                                                                        |
| IRF7  | interferon regulatory factor 7 | 104669_at   | 1.4708 | 0.0077 | Toll_like_receptor_signaling_pathway                                                                                                                                                                                                                                | Organismal Systems: Immune System                                                                                                                                                                                                                                                                                                                                                                                             |
|       |                                | 162202_f_at | 1.2999 | 0.0464 | RIG_I_like_receptor_signaling_pathway<br>Cytosolic_DNA_sensing_pathway                                                                                                                                                                                              | Organismal Systems: Immune System<br>Organismal Systems: Immune System                                                                                                                                                                                                                                                                                                                                                        |
| ITGB2 | integrin beta 2                | 102353_at   | 1.4139 | 0.0120 | Hepatitis_B<br>Hepatitis_C<br>Herpes_simplex_infection<br>Influenza_A<br>Measles<br>Viral_carcinogenesis                                                                                                                                                            | Human Diseases: Infectious diseases<br>Human Diseases: Cancers                                                                                                                                                                                                    |
|       |                                |             |        |        | Leukocyte_transendothelial_migration<br>Natural_killer_cell_mediated_cytotoxicity                                                                                                                                                                                   | Organismal Systems: Immune System<br>Organismal Systems: Immune System                                                                                                                                                                                                                                                                                                                                                        |
| MYL9  | transient receptor protein 2   | 96939_at    | 1.3586 | 0.0500 | Amoebiasis<br>HTLV_I_infection<br>Legionellosis<br>Leishmaniasis<br>Malaria<br>Pertussis<br>Cell_adhesion_molecules_(CAMs)                                                                                                                                          | Human Diseases: Infectious diseases<br>Human Diseases: Infectious diseases<br>Environmental Information Processing: Signaling molecules and interaction                                                                                                           |
|       |                                |             |        |        | Hippo_signaling_pathway<br>Leukocyte_transendothelial_migration<br>cAMP_signaling_pathway<br>cGMP_PKG_signaling_pathway<br>Focal_adhesion<br>Regulation_of_actin_cytoskeleton<br>Tight_junction<br>Vascular_smooth_muscle_contraction<br>Oxytocin_signaling_pathway | Environmental Information Processing: Signal transduction<br>Organismal Systems: Immune System<br>Environmental Information Processing: Signal transduction<br>Environmental Information Processing: Signal transduction<br>Cellular Process: Cellular community<br>Cellular Process: Cell motility<br>Cellular Process: Cellular community<br>Organismal Systems: Circulatory system<br>Organismal Systems: Endocrine system |

|       |                                             |           |        |        |                                                                                                                                                                                                                                                                                |                                                                                                                                                                                                                                                                                                                                                                                                                |
|-------|---------------------------------------------|-----------|--------|--------|--------------------------------------------------------------------------------------------------------------------------------------------------------------------------------------------------------------------------------------------------------------------------------|----------------------------------------------------------------------------------------------------------------------------------------------------------------------------------------------------------------------------------------------------------------------------------------------------------------------------------------------------------------------------------------------------------------|
| PLAUR | urokinase plasminogen activator receptor    | 102663_at | 1.3212 | 0.0264 | Complement_and_coagulation_cascades<br>Proteoglycans_in_cancer                                                                                                                                                                                                                 | Organismal Systems: Immune System<br>Human Diseases: Cancers                                                                                                                                                                                                                                                                                                                                                   |
| RAC2  | RAS-related C3 botulinum substrate 2        | 103579_at | 1.2760 | 0.0174 | Fc_gamma_R_mediated_phagocytosis<br>Fc_epsilon_RI_signaling_pathway<br>Chemokine_signaling_pathway<br>B_cell_receptor_signaling_pathway<br>Axon_guidance<br>Choline_metabolism_in_cancer<br>Colorectal_cancer<br>cAMP_signaling_pathway<br>Adherens_junction<br>Focal_adhesion | Organismal Systems: Immune System<br>Organismal Systems: Immune System<br>Organismal Systems: Immune System<br>Organismal Systems: Development<br>Human Diseases: Cancers<br>Human Diseases: Cancers<br>Environmental Information Processing: Signal transduction<br>Cellular Process: Cellular community<br>Cellular Process: Cellular community                                                              |
| ROCK2 | Rho-associated coiled-coil forming kinase 2 | 98504_at  | 1.7854 | 0.0040 | Leukocyte_transendothelial_migration<br>Chemokine_signaling_pathway<br>Platelet_activation<br>cAMP_signaling_pathway<br>cGMP_PKG_signaling_pathway<br>Focal_adhesion<br>Pathways_in_cancer<br>Proteoglycans_in_cancer<br>Axon_guidance<br>Oxytocin_signaling_pathway           | Organismal Systems: Immune System<br>Organismal Systems: Immune System<br>Organismal Systems: Immune System<br>Environmental Information Processing: Signal transduction<br>Environmental Information Processing: Signal transduction<br>Cellular Process: Cellular community<br>Human Diseases: Cancers<br>Human Diseases: Cancers<br>Organismal Systems: Development<br>Organismal Systems: Endocrine system |
| VCAM1 | vascular cell adhesion molecule 1           | 92559_at  | 1.4762 | 0.0053 | Leukocyte_transendothelial_migration<br>NF_kappa_B_signaling_pathway<br>TNF_signaling_pathway<br>African_trypanosomiasis<br>HTLV_I_infection<br>Malaria<br>Cell_adhesion_molecules_(CAMs)                                                                                      | Organismal Systems: Immune System<br>Environmental Information Processing: Signal transduction<br>Environmental Information Processing: Signal transduction<br>Human Diseases: Infectious diseases<br>Human Diseases: Infectious diseases<br>Human Diseases: Infectious diseases<br>Environmental Information Processing: Signaling molecules and interaction                                                  |
| VWF   | Von Willebrand factor homolog               | 103499_at | 1.2766 | 0.0354 | Complement_and_coagulation_cascades<br>Platelet_activation<br>PI3K_Akt_signaling_pathway<br>ECM_receptor_interaction<br>Focal_adhesion                                                                                                                                         | Organismal Systems: Immune System<br>Organismal Systems: Immune System<br>Environmental Information Processing: Signal transduction<br>Environmental Information Processing: Signaling molecules and interaction<br>Cellular Process: Cellular community                                                                                                                                                       |

The expression of these genes are significantly upregulated in DEN-treated wild type mouse livers (10-12 month) compared to the age-matched control samples. DAVID analysis coupled with KEGG Pathway indicates they belong to multiple functional groups but with the theme of "immune system", "immune diseases", and/or inflammation response (in red font). They are often involved in "infectious diseases" (in blue font), likely due to immune or inflammatory response to the pathogens. Many of them are also implicated in cell growth or cancer development.

(in blue font).
